# Supplementary material
Source: publisher figshare collection journal article supplement (https://sage.figshare.com/ndownloader/files/23454611)
Supplement: Supplementary file 1 [file 23454611]

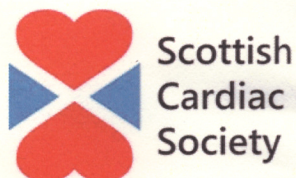

Monday, 07 October 2019

Dr Thomas Krysztofiak  
3/2 1 Whittingehame Park,  
Glasgow, G12 0NJ

Dear Dr Krysztofiak,

**Scottish Cardiac Society 28<sup>th</sup> Annual General Meeting  
Friday 20 September and Saturday 21 September 2019  
Dunblane Hydro Hotel, Dunblane**

I am delighted to inform you that your abstract

**The impact of CTCA on invasive angiography and revascularisation in patients who have undergone coronary artery bypass surgery. A single centre experience.**

won the "Best poster scientific paper (non-consultant physician)" award.

The award is for up to £250 to assist with attendance at a future meeting relevant to cardiology or cardiac surgery. The award will be provided upon production of your receipts. You are required to be a member of SCS (or in process of applying for SCS membership) to be eligible for this award.

SCS anticipate that recipients travel by standard class. If there is a good reason for not doing so please contact SCS to discuss this further.

In return, we require you to either submit a report to be presented at a SCS meeting and/or for publication on SCS website either about the meeting or the work that this grant is helping to support. We will be in touch in due course with further details of this.

We ask that you use this prize within 12 months. If you would like to use it after this date please contact [scs.admin@rcpe.ac.uk](mailto:scs.admin@rcpe.ac.uk). If you have any queries please do ask.

Thank you for supporting our Annual Meeting and well done for your excellent work and data.

Yours sincerely

**Professor Hany Eteiba  
President  
Scottish Cardiac Society**

Scottish Cardiac Society is an incorporated charity (SC020962) Registered  
Office: Royal College of Physicians of Edinburgh, 9 Queen Street, Edinburgh,  
EH2 1JQ. Registered in Scotland 269397.
